# Supplementary material for: Abnormal Eu3+ → Eu2+ Reduction in Ca9−xMnxEu(PO4)7 Phosphors: Structure and Luminescent Properties
Source: MDPI journal article supplement (doi:10.3390/ma16041383), 2023-02-07
Supplement: s1 [file s1]

# Abnormal $\text{Eu}^{3+} \rightarrow \text{Eu}^{2+}$ Reduction in $\text{Ca}_{9-x}\text{Mn}_x\text{Eu}(\text{PO}_4)_7$ Phosphors: Structure and Luminescent Properties

Elena V. Sipina <sup>1</sup>, Dmitry A. Spassky <sup>2,3</sup>, Nataliya R. Krutyak <sup>1,3</sup>, Vladimir A. Morozov <sup>4</sup>, Evgenia S. Zhukovskaya <sup>4</sup>, Alexei A. Belik <sup>5</sup>, Mikhail S. Manylov <sup>4</sup>, Bogdan I. Lazoryak <sup>4</sup> and Dina V. Deyneko <sup>4,6,\*</sup>

<sup>1</sup> Physics Department, Lomonosov Moscow State University, 119991 Moscow, Russia

<sup>2</sup> Skobeltsyn Institute of Nuclear Physics, Lomonosov Moscow State University, 119991 Moscow, Russia

<sup>3</sup> Institute of Physics, University of Tartu, 50411 Tartu, Estonia

<sup>4</sup> Department of Chemistry, Lomonosov Moscow State University, 119991 Moscow, Russia

<sup>5</sup> International Center for Materials Nanoarchitectonics (WPI-MANA), National Institute for Materials Science (NIMS), Tsukuba 305-0044, Ibaraki, Japan

<sup>6</sup> Laboratory of Arctic Mineralogy and Material Sciences, Kola Science Centre, Russian Academy of Sciences, 184209 Apatity, Russia

\* Correspondence: deynekomsu@gmail.com

**Table S1.** Atomic coordinates, displacement parameters ( $\text{\AA}^2$ ) and site-occupancy factors (SOFs) in the structure of  $\text{Ca}_8\text{MnEu}(\text{PO}_4)_7$ .

| Atom | Wyckoff site | $x$       | $y$        | $z$        | $U_{\text{iso}}$ | SOF                                   |
|------|--------------|-----------|------------|------------|------------------|---------------------------------------|
| M1   | 36           | 0.7210(1) | 0.8513(2)  | 0.43391(3) | 0.0029(3)        | $\text{Ca}_{0.884}+\text{Eu}_{0.116}$ |
| M3   | 36           | 0.1292(4) | 0.2752(3)  | 0.32625(6) | 0.0209(1)        | $\text{Ca}_{0.449}+\text{Eu}_{0.051}$ |
| M5   | 6            | 0         | 0          | 0          | 0.0144(9)        | $\text{Mn}_{1.000}$                   |
| P1   | 12           | 0         | 0          | 0.2686(2)  | 0.016(2)         | $\text{P}_{0.500}$                    |
| P2   | 36           | 0.3189(2) | 0.1752(3)  | 0.36531(6) | 0.0054(6)        | $\text{P}_1$                          |
| O1   | 12           | 0         | 0          | 0.3131(4)  | 0.0097           | $\text{O}_{0.5}$                      |
| O2   | 36           | 0.0044(5) | -0.1416(1) | 0.2577(3)  | 0.0097           | $\text{O}_{0.5}$                      |
| O3   | 36           | 0.2873(4) | 0.1717(5)  | 0.3256(2)  | 0.0058           | $\text{O}_1$                          |
| O4   | 36           | 0.2480(5) | 0.0155(5)  | 0.382445   | 0.0058           | $\text{O}_1$                          |
| O5   | 36           | 0.2694(5) | 0.2802(5)  | 0.3819(4)  | 0.0058           | $\text{O}_1$                          |
| O6   | 36           | 0.4917(4) | 0.2484(7)  | 0.3717(1)  | 0.0058           | $\text{O}_1$                          |

**Table S2.** Selected interatomic distances for Ca<sub>8</sub>MnEu(PO<sub>4</sub>)<sub>7</sub>.

| Polyhedra               | Distance                   | Value, Å     |
|-------------------------|----------------------------|--------------|
| <i>M1O</i> <sub>8</sub> | <i>M1</i> -O2              | 2.431(2)     |
|                         | <i>M1</i> -O2              | 2.358(7)     |
|                         | <i>M1</i> -O3              | 2.355(3)     |
|                         | <i>M1</i> -O4              | 2.348(5)     |
|                         | <i>M1</i> -O4              | 2.707(5)     |
|                         | <i>M1</i> -O5              | 2.403(5)     |
|                         | <i>M1</i> -O5              | 2.579(6)     |
|                         | <i>M1</i> -O6              | 2.404(6)     |
|                         | <i>M1</i> -O6              | 2.458(4)     |
|                         | <b>&lt;<i>M1</i>-O&gt;</b> | <b>2.449</b> |
| <i>M3O</i> <sub>9</sub> | <i>M3</i> -O1              | 2.543(2)     |
|                         | <i>M3</i> -O2              | 2.920(1)     |
|                         | <i>M3</i> -O3              | 2.383(5)     |
|                         | <i>M3</i> -O3              | 2.709(4)     |
|                         | <i>M3</i> -O3              | 2.882(5)     |
|                         | <i>M3</i> -O4              | 2.479(5)     |
|                         | <i>M3</i> -O4              | 2.571(4)     |
|                         | <i>M3</i> -O5              | 2.533(5)     |
|                         | <i>M3</i> -O5              | 2.242(6)     |
|                         | <b>&lt;<i>M3</i>-O&gt;</b> | <b>2.585</b> |
| <i>M5O</i> <sub>6</sub> | <i>M5</i> -O6×6            | 2.132(3)     |
|                         |                            |              |
|                         | <b>&lt;<i>M5</i>-O&gt;</b> | <b>2.132</b> |
| <i>P1O</i> <sub>4</sub> | <i>P1</i> -O1              | 1.577(5)     |
|                         | <i>P1</i> -O2×3            | 1.555(1)     |
|                         | <b>&lt;<i>P1</i>-O&gt;</b> | <b>1.561</b> |
| <i>P2O</i> <sub>4</sub> | <i>P2</i> -O3              | 1.510(4)     |
|                         | <i>P2</i> -O4              | 1.568(4)     |
|                         | <i>P2</i> -O5              | 1.546(5)     |
|                         | <i>P2</i> -O6              | 1.574(3)     |
|                         | <b>&lt;<i>P2</i>-O&gt;</b> | <b>1.550</b> |
